# Supplementary material
Source: PubMed Central journal article supplement (PMC4098076)
Supplement: NIHMS611159-supplement-Supplemental_data.pdf [file NIHMS611159-supplement-Supplemental_data.pdf]

**Extended Data Table 1.** Primers used in Real-Time reverse transcriptase PCR

| <b>GENE</b>   | <b>FORWARD SEQUENCE</b>                 | <b>REVERSE SEQUENCE</b>               |
|---------------|-----------------------------------------|---------------------------------------|
| <i>Gapdh</i>  | 5'- GCC TTC CGT GTT CCT ACC C -3'       | 5'- CAG TGG GCC CTC AGA TGC -3'       |
| <i>Ahr</i>    | 5'- CCA CTG ACG GAT GAA GAA GGA -3'     | 5'- ATC TCG TAC AAC ACA GCC TCT C -3' |
| <i>Cyp1a1</i> | 5'- GAC ACA GTG ATT GGC AGA G -3'       | 5'- GAA GGT CTC CAG AAT GAA GG -3'    |
| <i>Ido1</i>   | 5'- TCT GCC TGT GCT GAT TGA -3'         | 5'- CTG TAA CCT GTG TCC TCT CA -3'    |
| <i>Ido2</i>   | 5'- CTC AGA CTT CCT CAC TTA ATC G -3'   | 5'- GCT GCT CAC GGT AAC TCT -3'       |
| <i>Tdo2</i>   | 5'- GTG AAC GAC GAC TGT CAT ACC G -3'   | 5'- GCT GGA AAG GGA CCT GGA AT -3'    |
| <i>Foxp3</i>  | 5' - CCC AGG AAA GAC AGC AAC CTT TT -3' | 5' - TTC TCA CAA CCA GGC CAC TTG - 3' |
| <i>Rorc</i>   | 5' - ACA ACA GCA GCA AGT GAT GG - 3'    | 5' - CCT GGA TTT ATC CCT GCT GA - 3'  |
| <i>Tgfb1</i>  | 5' - CAC AGA GAA GAA CTG CTG TG- 3'     | 5' - AGG AGC GCA CAA TCA TGT TG- 3'   |
| <i>Il10</i>   | 5' - ACC AGC TGG ACA ACA TAC TG- 3'     | 5' - CGC ATC CTG AGG GTC TTC AG- 3'   |

**Extended Data Table 2.** Complete list of datasets used to assess gene expression levels of tyrosine kinases in mouse myeloid dendritic cells.

| GEO accession | Platform    | Total samples in series | # of un-stimulated samples | # of LPS stimulated samples | GEO accession of used samples                    | Reference |
|---------------|-------------|-------------------------|----------------------------|-----------------------------|--------------------------------------------------|-----------|
| GSE28231      | MOE 430 2.0 | 5                       | 1                          | 1                           | GSM698691<br>GSM698692                           | 1         |
| GSE28340      | MOE 430 2.0 | 8                       | 2                          | 2                           | GSM700775<br>GSM700776<br>GSM700777<br>GSM700778 | 2         |
| GSE18115      | MOE 430 2.0 | 8                       | 1                          | 2                           | GSM452757<br>GSM452759<br>GSM452761              | 3         |
| GSE23641      | MOE 430 2.0 | 2                       | 0                          | 1                           | GSM579979                                        | 4         |
| GSE16761      | MOE 430 2.0 | 3                       | 1                          | 1                           | GSM420166<br>GSM420165                           | 5         |
| GSE10246      | MOE 430 2.0 | 182                     | 2                          | 0                           | GSM258647<br>GSM258648                           | 6         |
| GSE7219       | MOE 430 2.0 | 12                      | 3                          | 0                           | GSM173580<br>GSM173581<br>GSM173582              | 7         |

## References

1. Pletinckx, K., *et al.* Similar inflammatory DC maturation signatures induced by TNF or *Trypanosoma brucei* antigens instruct default Th2-cell responses. *Eur. J. Immunol.* **41**, 3479-3494 (2011).
2. Sun, Y., *et al.* Targeting of microRNA-142-3p in dendritic cells regulates endotoxin-induced mortality. *Blood* **117**, 6172-6183 (2011).
3. Clavarino, G., *et al.* Protein phosphatase 1 subunit Ppp1r15a/GADD34 regulates cytokine production in polyinosinic:polycytidylic acid-stimulated dendritic cells. *Proc. Natl. Acad. Sci. U S A* **109**, 3006-3011 (2012).
4. O'Connell, R.M., *et al.* MicroRNA-155 promotes autoimmune inflammation by enhancing inflammatory T cell development. *Immunity* **33**, 607-619 (2010).
5. Koga, K., *et al.* Cyclic adenosine monophosphate suppresses the transcription of proinflammatory cytokines via the phosphorylated c-Fos protein. *Immunity* **30**, 372-383 (2009).
6. Lattin, J.E., *et al.* Expression analysis of G Protein-Coupled Receptors in mouse macrophages. *Immunome Res.* **4**, 5 (2008).
7. Lind, E.F., *et al.* Dendritic cells require the NF- $\kappa$ B2 pathway for cross-presentation of soluble antigens. *J. Immunol.* **181**, 354-363 (2008).

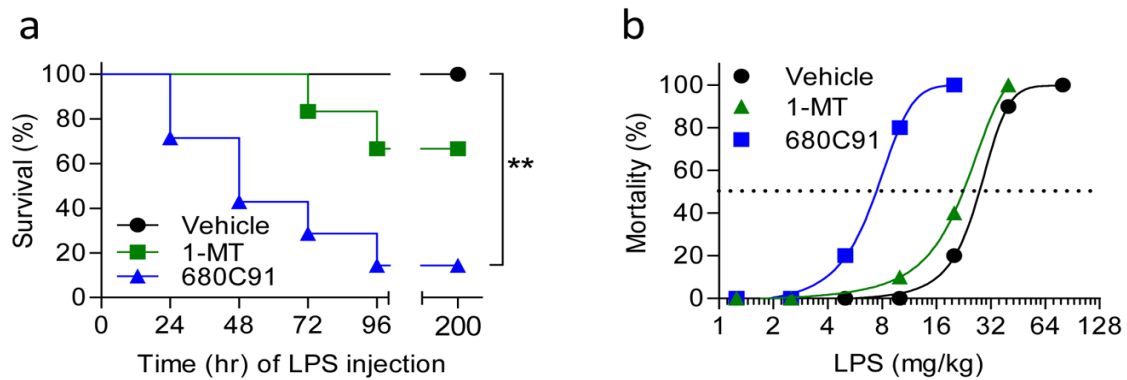

**Extended Data Fig. 1. Increased susceptibility to primary LPS challenge in mice treated with a TDO2 inhibitor.** (a) Twelve hours before LPS challenge (10 mg/kg), WT mice were treated with vehicle, the IDO1 and IDO2 inhibitor 1-MT (200 mg/kg), or the TDO2 inhibitor 680C91 (10 mg/kg), control groups receiving 1-MT or 680C91 but no LPS. Survival was monitored every 24 h through day 8 of LPS challenge ( $n = 10$  mice per group per experiment, in one out of three).  $**P < 0.001$  (log-rank test). (b) Estimation of  $LD_{50}$  (mg/kg) in mice treated with 1.25, 2.5, 5, 10, 20, 40, or 80 mg/kg LPS.  $n = 10$  per group per dose.  $LD_{50}$  values were calculated by curve-fitting ( $r^2 \geq 0.95$ ) in one experiment representative of two.

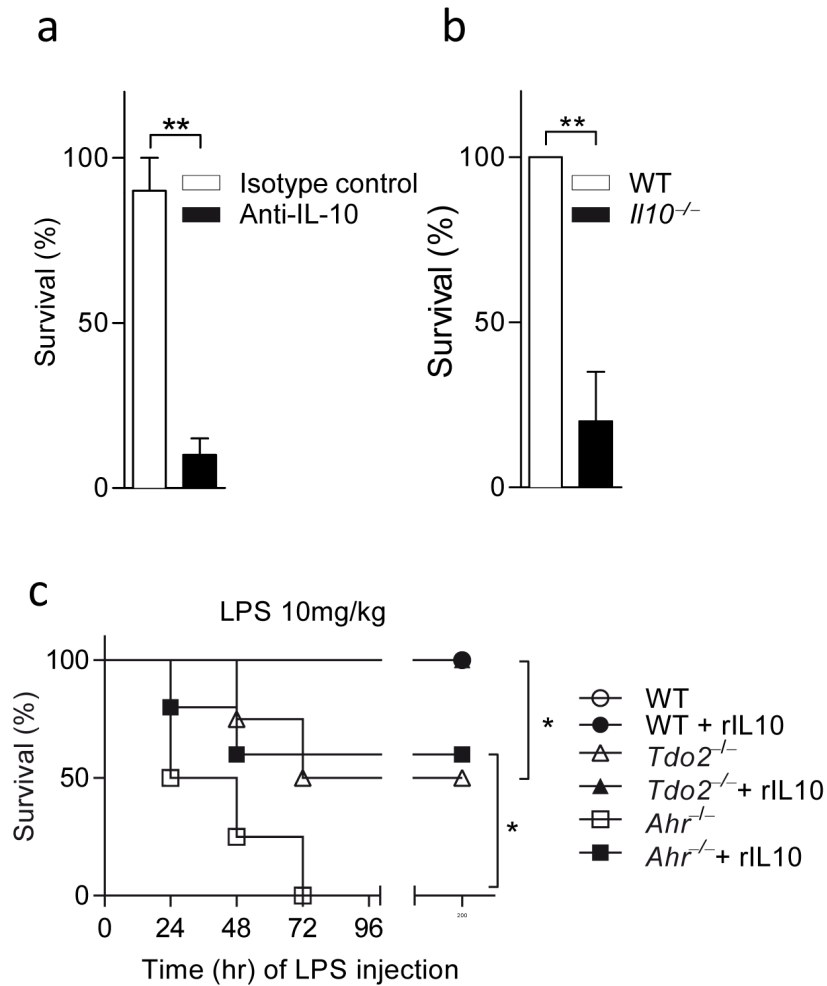

**Extended Data Fig. 2. Lack of endogenous IL-10 increases susceptibility to endotoxemia.** (a) Survival of WT mice exposed to 10 mg/kg LPS in the presence of anti-IL-10 (0.2 mg/mouse daily, for 4 d, commencing 6 h before challenge) or an isotype control. Data are from three independent experiments (mean  $\pm$  s.d.). (b) Survival of WT and *Il10*<sup>-/-</sup> mice treated with 10 mg/kg LPS. \*\* $P < 0.001$  (log-rank test). (c) Survival curves of mice of different genotypes challenged with 10 mg/kg LPS, with or without therapeutic subcutaneous IL-10 at 250 ng/mouse, daily, from challenge (day 0) through day 5. \* $P < 0.05$  (IL-10 vs. vehicle). The data show that exogenous IL-10 compensates for both the TDO2 and AhR defects at the lower LPS dosage. IL-10 is protective only in TDO2 knockouts when 20 mg/kg LPS is used.

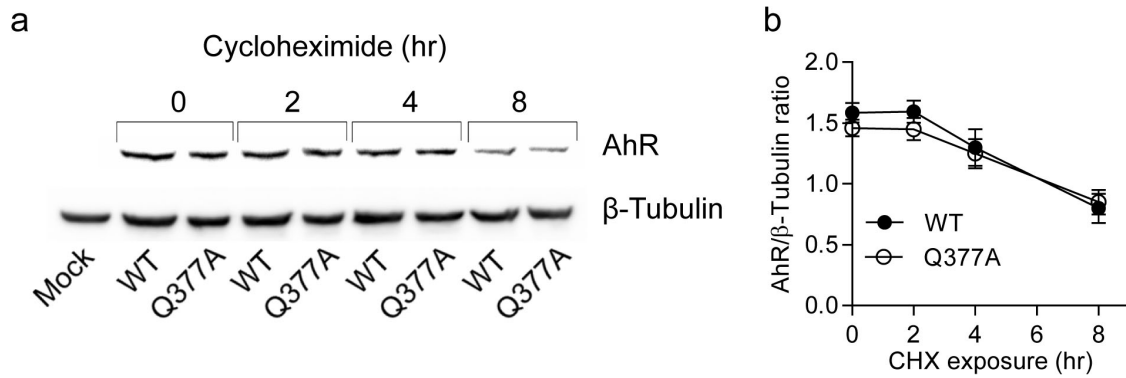

**Extended Data Fig. 3. Mutation of Gln377 to Ala in AhR PAS-B domain does not alter receptor half-life, and apparently results in increased TCDD ligand potency.**

(a) AhR-deficient cDCs were transfected with WT or Q377A AhR. After 24 h, cells were incubated with cycloheximide (CHX) (10  $\mu$ g/ml) and harvested at different times, lysed, and analyzed for AhR expression by immunoblotting, using a specific antibody.  $\beta$ -tubulin was used as a loading control. Data are from one experiment of three. (b) Ratios (means  $\pm$  s.d. of three experiments) of WT or Q377A AhR to  $\beta$ -tubulin in transfected cDCs at different times of CHX treatment. (No differences by Student's *t*-test.)

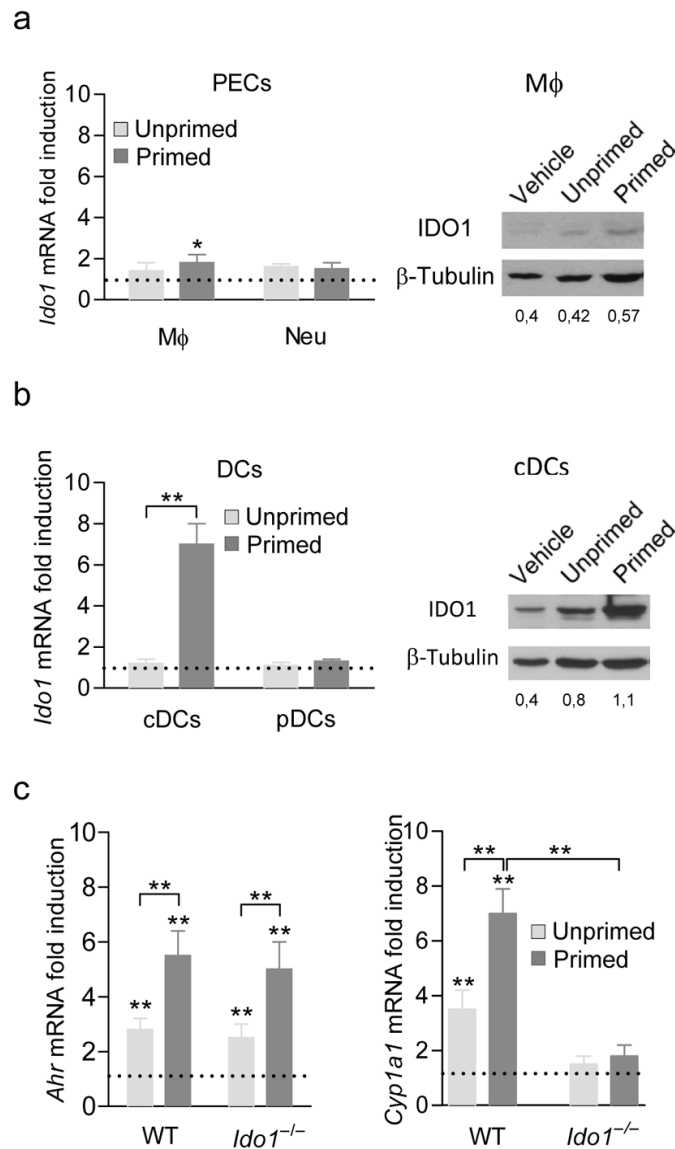

**Extended Data Fig. 4. LPS tolerance potentiates IDO1 expression and AhR activation in splenic cDCs.** (a) Real-time PCR analysis of *Ido1* mRNA expression and immunoblot analysis of IDO1 protein in peritoneal exudate macrophages (M $\Phi$ ) and neutrophils (Neu) (a), as well as in splenic conventional DCs (cDCs) or plasmacytoid DCs (pDCs) (b). Cells were harvested and purified at 24 (a) or 72 (b) h of LPS rechallenge. For comparison, samples were included from mice on first exposure to 40 mg/kg LPS (unprimed), as opposed to tolerized mice (primed). Data of *Ido1* mRNA fold induction are presented as in Fig. 2a (mean  $\pm$  s.d. of three experiments; \* $P$  < 0.05 and \*\* $P$  < 0.001, Shapiro test). Immunoblotting data are from one experiment of three. (c) Real-time PCR analysis of *Ahr* and *Cyp1a1* transcript expressions in cDCs from the same mice as in b. \*\* $P$  < 0.001, Shapiro test.

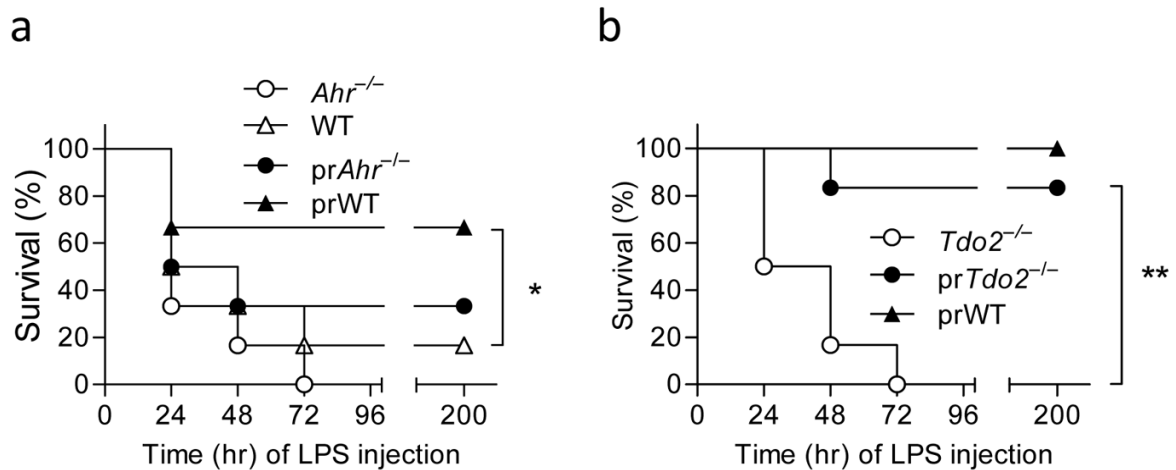

**Extended Data Fig. 5. Absolute requirement for functional AhR, but not TDO2, in LPS tolerance manifestations.** (a) Survival curves of WT and LPS-primed (0.5 mg/kg, day 0) WT (prWT) and AhR-deficient (pr*Ahr*<sup>-/-</sup>) mice after a second challenge (on day +7) with 40 mg/kg LPS. Survival was monitored every 24 h through day 8 of LPS challenge.  $n = 8-10$  mice per group per experiment. One experiment of three.  $*P < 0.05$ , log-rank test. (b) Survival curves of WT and LPS-primed (10 mg/kg, day 0) WT (prWT) and TDO2-deficient (pr*Tdo2*<sup>-/-</sup>) mice after a second challenge (on day +7) with 40 mg/kg LPS. Survival was monitored every 24 h through day 8 of LPS challenge.  $n = 8-10$  mice per group per experiment. One experiment of three.  $**P < 0.001$ , log-rank test.

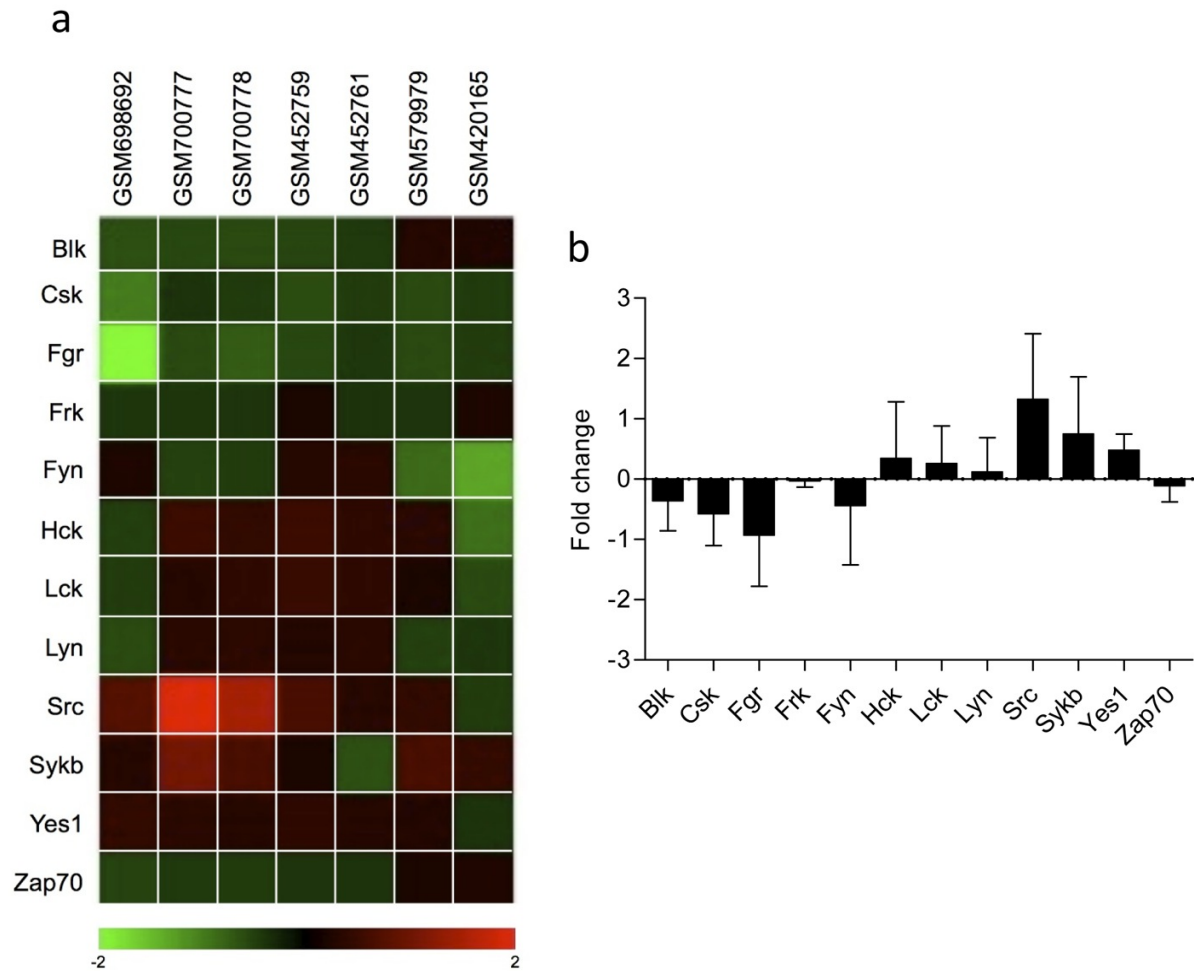

**Extended Data Fig. 6. Bioinformatic data from myeloid cDCs data sets, as follows, (a) expression changes of tyrosine kinases in LPS-primed myeloid DCs as compared to untreated counterparts, and (b) log<sub>2</sub> fold changes, depicted as mean values and standard errors.**



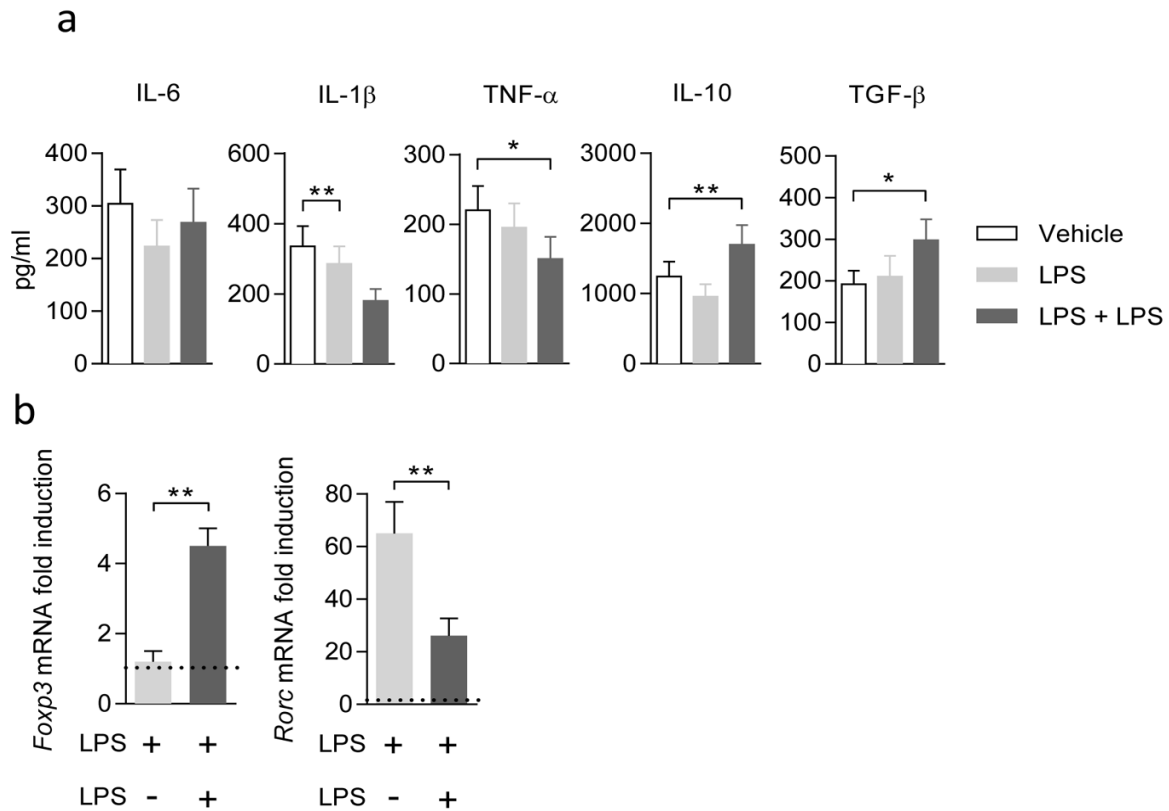

**Extended Data Fig. 7. LPS tolerance modulates cytokine production and *Foxp3* and *Rorc* transcription in *S. Typhimurium* infection.** (a) IL-6, IL-1 $\beta$ , TNF- $\alpha$ , IL-10, and TGF- $\beta$  were measured in ceum cell supernatants from LPS-tolerant mice infected with *S. enterica* Typhimurium. Data are from three independent experiments (means  $\pm$  s.d.). \* $P < 0.05$  and \*\* $P < 0.001$  (Student's *t*-test). (b) RT-PCR expression of *Foxp3* and *Rorc* transcripts in mesenteric lymph node cells from LPS-tolerant, *Salmonella*-infected mice. Data (mean  $\pm$  s.d. of three experiments) are presented as normalized transcript expression in the samples relative to normalized transcript expression in control cultures (that is, cells from vehicle-treated mice, in which fold change = 1; dotted line). \* $P < 0.05$ ; \*\* $P < 0.001$  (Shapiro test).

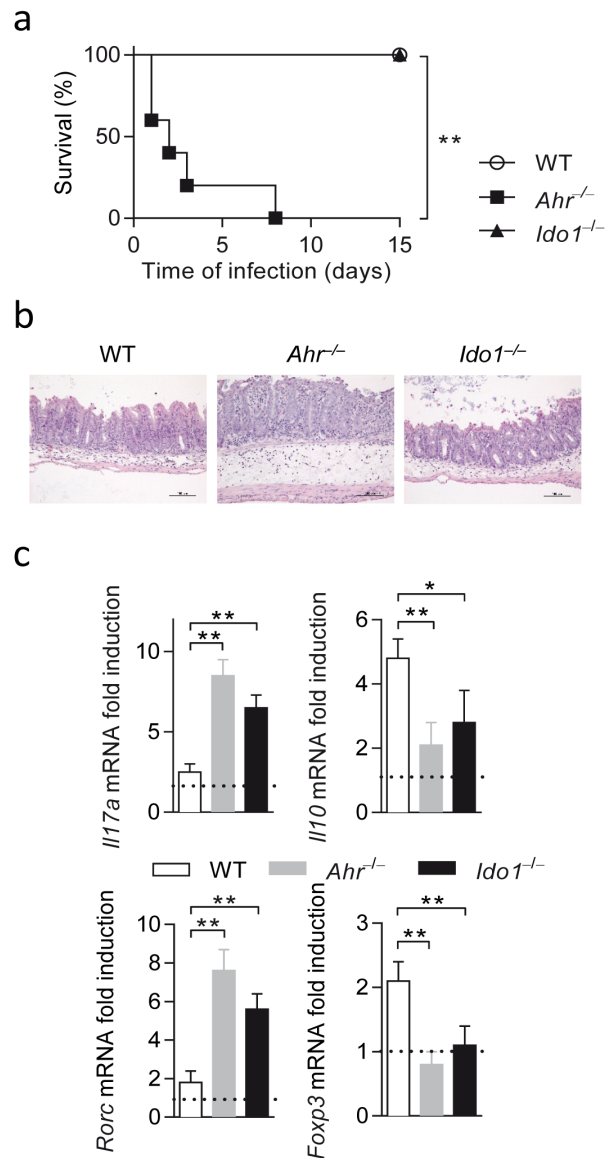

**Extended Data Fig. 8. *Ahr*<sup>-/-</sup> and *Ido*<sup>-/-</sup> mice are more susceptible than WT mice to *S. Typhimurium* infection.** (a) Naïve mice of different genotypes were challenged intragastrically with *S. Typhimurium*. Mortality data were recorded (\*\**P* < 0.001, WT vs. all other genotypes; log-rank test) and (b) H&E staining of mouse ceca was performed at 7 days of infection. Scale bars, 50  $\mu$ m. One of three experiments. (c) Transcript expressions of *Il17a*, *Rorc*, *Il10*, and *Foxp3* were quantified in mesenteric lymph node cells. Data (mean  $\pm$  s.d. of three experiments) are presented as normalized transcript expression in the samples relative to normalized transcript expression in cells from uninfected donors, in which fold change = 1. \*\**P* < 0.001 (Shapiro test).

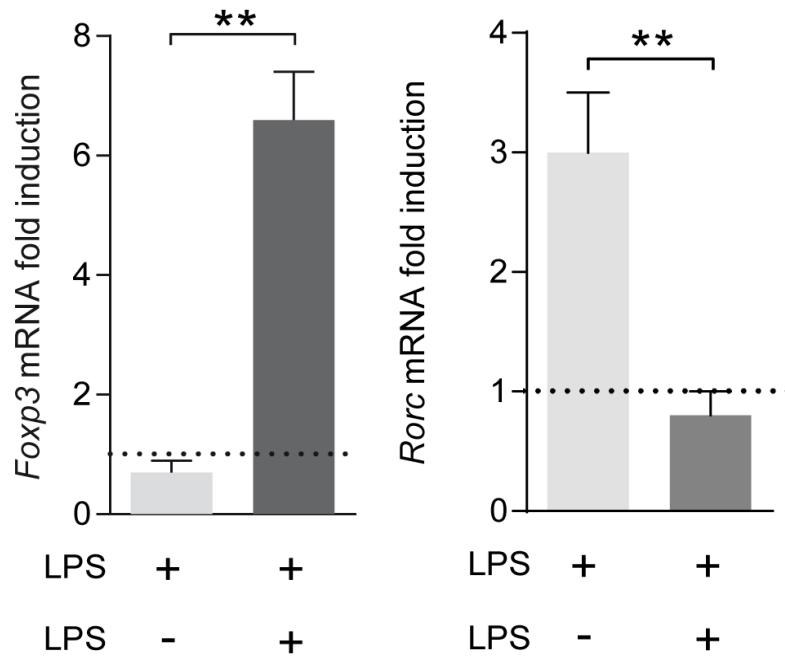

**Extended Data Fig. 9. LPS tolerance modulates Foxp3 and Rorc transcription in GBS infection.** RT-PCR expression of *Foxp3* and *Rorc* transcripts in joint-draining lymph node cells from LPS-tolerant, GBS-infected mice. Data (mean  $\pm$  s.d. of three experiments) are presented as normalized transcript expression in the samples relative to normalized transcript expression in control cells (that is, cells from vehicle-treated mice, in which fold change = 1; dotted line). \*\* $P < 0.001$  (Shapiro test).

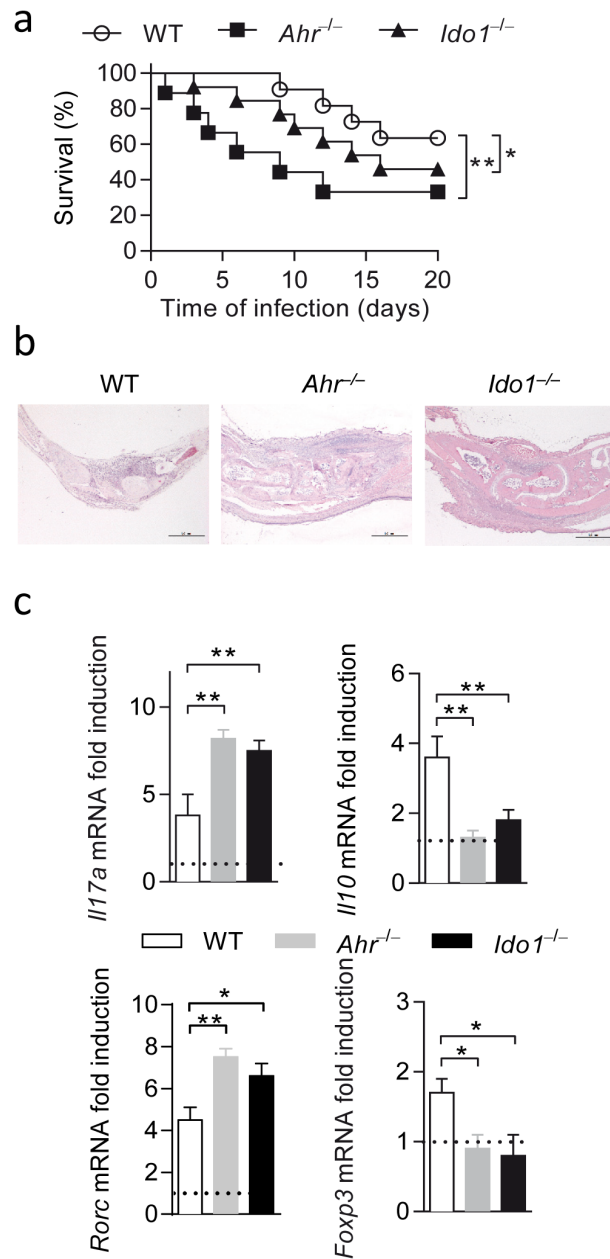

**Extended Data Fig. 10. *Ahr*<sup>-/-</sup> and *Ido1*<sup>-/-</sup> mice are more susceptible than WT mice to GBS immunopathology.** (a) Naïve mice of different genotypes were infected with GBS ( $1 \times 10^7$  CFU). Mortality data were recorded (\* $P < 0.05$  and \*\* $P < 0.001$ , WT vs. all other genotypes; log-rank test). (b) H&E staining of joints was performed at 10 days of infection. Scale bars, 100  $\mu$ m. One of three experiments. (c) Transcript expressions of *Il17a*, *Rorc*, *Il10*, and *Foxp3* were quantified in joint-draining lymph nodes. Data (mean  $\pm$  s.d. of three experiments) are presented as normalized transcript expression in the samples relative to normalized transcript expression in cells from uninfected donors, in which fold change = 1. \*\* $P < 0.001$  (Shapiro test).
